# Supplementary material for: Magnetic Mesoporous Carbon/β-Cyclodextrin–Chitosan Nanocomposite for Extraction and Preconcentration of Multi-Class Emerging Contaminant Residues in Environmental Samples
Source: PubMed Central journal article supplement (PMC7924173; doi:10.3390/nano11020540), 2021-02-20
Supplement: nanomaterials-11-00540-s001.pdf [file nanomaterials-11-00540-s001.pdf]

# Magnetic Mesoporous Carbon/ $\beta$ -Cyclodextrin–Chitosan Nanocomposite for Extraction and Preconcentration of Multi-Class Emerging Contaminant Residues in Environmental Samples

## Supplementary data

### *S1. Instrumentation*

A Scientech ultrasonic cleaner (Labotec, Midrand, South Africa) with a volume of 5.7 L (internal dimensions: 300 × 153 × 150 mm) was used to facilitate the adsorption process. The ultrasonic system was equipped with a variable frequency and power setting. In this study, the frequency was fixed at 50 Hz and the emission power of 150 W. The analysis of the antibiotics was performed using an Agilent HPLC 1200 Infinity series, equipped with a photodiode array detector (Agilent Technologies, Waldron, Germany). Chromatograms were recorded at 290 nm. While an Agilent Zorbax Eclipse Plus C18 column (3.5  $\mu$ m × 150 mm × 4.6 mm) (Agilent, Newport, CA, USA) was operated at an oven temperature of 25 °C. The mobile phase for separation of fluoroquinolones was composed of water (10 mmol L<sup>-1</sup>) of phosphoric acid, the pH adjusted to 3.29 with triethylamine): acetonitrile (85.7:14.3, *v/v*) at a flow rate of 1.0 mL min<sup>-1</sup>. All chromatographic experiments were carried out 25 ± 3 °C while the injection volume was 1.0  $\mu$ L for all samples. For analysis of  $\beta$ -blockers, CBZ and parabens, the mobile phase consisted of 30% water: 70% methanol mixture at a flowrate of 1.00 mL min<sup>-1</sup>.

**Table S1.** CCD Matrix and analytical response: preconcentration of Beta-blockers and CBZ.

| Run    | %Recovery |         |        |      |      |      |
|--------|-----------|---------|--------|------|------|------|
|        | pH        | ET(min) | MA(mg) | ANTL | PPNL | CBZ  |
| 1      | 4.0       | 5.0     | 20.0   | 75.6 | 75.4 | 76.1 |
| 2      | 4.0       | 5.0     | 50.0   | 72.1 | 71.9 | 72.6 |
| 3      | 4.0       | 20.0    | 20.0   | 81.3 | 81.1 | 81.8 |
| 4      | 4.0       | 20.0    | 50.0   | 87.0 | 86.8 | 87.5 |
| 5      | 9.0       | 5.0     | 20.0   | 52.3 | 52.1 | 52.8 |
| 6      | 9.0       | 5.0     | 50.0   | 59.4 | 59.2 | 59.9 |
| 7      | 9.0       | 20.0    | 20.0   | 63.9 | 63.7 | 64.4 |
| 8      | 9.0       | 20.0    | 50.0   | 65.3 | 65.1 | 65.8 |
| 9      | 2.8       | 12.5    | 35.0   | 56.0 | 55.8 | 56.5 |
| 10     | 10.2      | 12.5    | 35.0   | 45.3 | 45.1 | 45.8 |
| 11     | 6.5       | 1.5     | 35.0   | 33.3 | 33.1 | 33.8 |
| 12     | 6.5       | 23.5    | 35.0   | 98.3 | 98.1 | 98.8 |
| 13     | 6.5       | 12.5    | 12.9   | 63.7 | 63.5 | 64.2 |
| 14     | 6.5       | 12.5    | 57.1   | 98.7 | 98.5 | 99.2 |
| 15 (C) | 6.5       | 12.5    | 35.0   | 98.6 | 98.4 | 99.1 |
| 16 (C) | 6.5       | 12.5    | 35.0   | 99.2 | 99.0 | 99.7 |
| 17 (C) | 6.5       | 12.5    | 35.0   | 99.3 | 99.1 | 99.8 |
| 18 (C) | 6.5       | 12.5    | 35.0   | 98.5 | 98.3 | 99.0 |
| 19 (C) | 6.5       | 12.5    | 35.0   | 97.9 | 97.7 | 98.4 |

**Table S2.** CCD Matrix and analytical response: preconcentration of fluoquinolones.

| Run    | %recovery |         |        |      |      |      |
|--------|-----------|---------|--------|------|------|------|
|        | pH        | ET(min) | MA(mg) | DANO | ENRO | LEVO |
| 1      | 4.0       | 5.0     | 20.0   | 60.5 | 65.5 | 63.9 |
| 2      | 4.0       | 5.0     | 50.0   | 64.0 | 67.4 | 65.0 |
| 3      | 4.0       | 20.0    | 20.0   | 78.9 | 78.9 | 81.7 |
| 4      | 4.0       | 20.0    | 50.0   | 84.4 | 84.4 | 85.2 |
| 5      | 9.0       | 5.0     | 20.0   | 74.9 | 78.1 | 80.2 |
| 6      | 9.0       | 5.0     | 50.0   | 75.2 | 85.2 | 86.1 |
| 7      | 9.0       | 20.0    | 20.0   | 80.2 | 89.7 | 91.2 |
| 8      | 9.0       | 20.0    | 50.0   | 81.1 | 90.1 | 87.2 |
| 9      | 2.8       | 12.5    | 35.0   | 54.5 | 54.5 | 56.8 |
| 10     | 10.2      | 12.5    | 35.0   | 21.0 | 24.8 | 23.0 |
| 11     | 6.5       | 1.5     | 35.0   | 55.4 | 55.4 | 52.7 |
| 12     | 6.5       | 23.5    | 35.0   | 98.1 | 98.1 | 99.7 |
| 13     | 6.5       | 12.5    | 12.9   | 47.1 | 47.1 | 43.1 |
| 14     | 6.5       | 12.5    | 57.1   | 98.1 | 101  | 99.5 |
| 15 (C) | 6.5       | 12.5    | 35.0   | 99.9 | 99.9 | 96.7 |
| 16 (C) | 6.5       | 12.5    | 35.0   | 99.8 | 99.8 | 97.1 |
| 17 (C) | 6.5       | 12.5    | 35.0   | 98.9 | 102  | 98.1 |
| 18 (C) | 6.5       | 12.5    | 35.0   | 100  | 100  | 96.7 |
| 19 (C) | 6.5       | 12.5    | 35.0   | 98.1 | 98.1 | 96.9 |

**Table S3.** CCD Matrix and analytical response: preconcentration of parabens.

| Run    | %Recovery |         |        |      |      |       |       |
|--------|-----------|---------|--------|------|------|-------|-------|
|        | pH        | ET(min) | MA(mg) | MP   | EP   | PP    | BP    |
| 1      | 4.0       | 5.0     | 20.0   | 73.0 | 75.0 | 73.5  | 73.8  |
| 2      | 4.0       | 5.0     | 50.0   | 79.0 | 81.2 | 79.5  | 79.8  |
| 3      | 4.0       | 20.0    | 20.0   | 89.0 | 92.3 | 89.5  | 89.8  |
| 4      | 4.0       | 20.0    | 50.0   | 88.0 | 87.4 | 88.5  | 88.8  |
| 5      | 9.0       | 5.0     | 20.0   | 56.0 | 54.6 | 56.5  | 56.8  |
| 6      | 9.0       | 5.0     | 50.0   | 63.0 | 64.8 | 63.5  | 63.8  |
| 7      | 9.0       | 20.0    | 20.0   | 71.0 | 75.4 | 71.5  | 71.8  |
| 8      | 9.0       | 20.0    | 50.0   | 75.3 | 73.3 | 75.8  | 76.1  |
| 9      | 2.8       | 12.5    | 35.0   | 60.0 | 59.8 | 60.5  | 60.8  |
| 10     | 10.2      | 12.5    | 35.0   | 56.0 | 54.7 | 56.5  | 56.8  |
| 11     | 6.5       | 1.5     | 35.0   | 21.3 | 24.7 | 21.8  | 22.1  |
| 12     | 6.5       | 23.5    | 35.0   | 96.7 | 97.6 | 97.2  | 97.5  |
| 13     | 6.5       | 12.5    | 12.9   | 69.0 | 71.2 | 69.5  | 69.8  |
| 14     | 6.5       | 12.5    | 57.1   | 99.7 | 98.7 | 100.2 | 100.5 |
| 15 (C) | 6.5       | 12.5    | 35.0   | 98.7 | 97.8 | 99.2  | 99.5  |
| 16 (C) | 6.5       | 12.5    | 35.0   | 97.6 | 97.6 | 98.1  | 98.4  |
| 17 (C) | 6.5       | 12.5    | 35.0   | 98.5 | 98.1 | 99.0  | 99.3  |
| 18 (C) | 6.5       | 12.5    | 35.0   | 98.3 | 98.4 | 98.8  | 99.1  |
| 19 (C) | 6.5       | 12.5    | 35.0   | 97.9 | 98.3 | 98.4  | 98.7  |

**Table S4.** Analytical characteristics of DMSPE-HPLC-DAD method for determination of atenolol, propranolol and carbamazepine.

| Analytical performances            | Atenolol | Propranolol | Carbamazepine |
|------------------------------------|----------|-------------|---------------|
| Linearity ( $\mu\text{g L}^{-1}$ ) | LOQ-300  | LOQ-400     | LOQ-350       |
| Correlation coefficient ( $R^2$ )  | 0.9987   | 0.9991      | 0.9989        |
| LOD ( $\text{ng L}^{-1}$ )         | 0.7      | 0.1         | 0.3           |
| LOQ ( $\text{ng L}^{-1}$ )         | 2.3      | 0.33        | 1.0           |
| Repeatability (%RSD)               | 2.5      | 1.9         | 2.1           |
| Reproducibility(%RSD)              | 4.3      | 3.4         | 3.1           |

**Table S5.** Analytical characteristics of DMSPE-HPLC-DAD method for determination of DANO, ENRO and LEVO.

| <b>Analytical performances</b>                     | <b>DANO</b> | <b>ENRO</b> | <b>LEVO</b> |
|----------------------------------------------------|-------------|-------------|-------------|
| <b>Linearity (<math>\mu\text{g L}^{-1}</math>)</b> | LOQ-950     | LOQ-1000    | LOQ-850     |
| <b>Correlation coefficient (<math>R^2</math>)</b>  | 0.9987      | 0.9979      | 0.9990      |
| <b>LOD (<math>\mu\text{g L}^{-1}</math>)</b>       | 0.73        | 1.1         | 0.45        |
| <b>LOQ (<math>\mu\text{g L}^{-1}</math>)</b>       | 2.4         | 3.7         | 1.5         |
| <b>Repeatability (%RSD)</b>                        | 1.8         | 3.4         | 2.5         |
| <b>Reproducibility(%RSD)</b>                       | 3.0         | 2.8         | 4.4         |

**Table S6.** Analytical characteristics of DMSPE-HPLC-DAD method for determination of four parabens.

| <b>Analytical performances</b>                     | <b>Methyl parabens</b> | <b>Ethyl-- parabens</b> | <b>Propyl- parabens</b> | <b>Butyl- parabens</b> |
|----------------------------------------------------|------------------------|-------------------------|-------------------------|------------------------|
| <b>Linearity (<math>\mu\text{g L}^{-1}</math>)</b> | LOQ-250                | LOQ-300                 | LOQ-250                 | LOQ-300                |
| <b>Correlation coefficient (<math>R^2</math>)</b>  | 0.9987                 | 0.9991                  | 0.9989                  | 0.9993                 |
| <b>LOD (<math>\text{ng L}^{-1}</math>)</b>         | 0.8                    | 0.2                     | 0.5                     | 0.4                    |
| <b>LOQ (<math>\text{ng L}^{-1}</math>)</b>         | 2.7                    | 0.67                    | 1.7                     | 1.3                    |
| <b>Repeatability (%RSD)</b>                        | 2.7                    | 1.5                     | 2.1                     | 2.3                    |
| <b>Reproducibility(%RSD)</b>                       | 3.6                    | 4.4                     | 2.9                     | 3.7                    |

**Table S7.** Determination of atenolol, propranolol and carbamazepine in real water samples (ng L<sup>-1</sup>, n = 3).

| <b>Samples</b>     | <b>Analytes</b> | <b>Initial (ng L<sup>-1</sup>)</b> | <b>Found (ng L<sup>-1</sup>)</b> | <b>%R1</b> | <b>%RSD</b> | <b>Found (ng L<sup>-1</sup>)</b> | <b>%R2</b> | <b>%RSD</b> |
|--------------------|-----------------|------------------------------------|----------------------------------|------------|-------------|----------------------------------|------------|-------------|
|                    |                 |                                    | 50                               |            |             | 100                              |            |             |
| <b>Influent</b>    | Atenolol        | 28.9±0.7                           | 72.1±2.0                         | 86.3       | 2.8         | 118±4                            | 88.8       | 3.4         |
|                    | Propranolol     | 20.6±0.5                           | 66.3±3                           | 91.3       | 4.5         | 110±3                            | 89.7       | 2.7         |
|                    | Carbamazepine   | ND                                 | 47.2±1.6                         | 94.4       | 3.3         | 93.3±1.5                         | 93.3       | 1.6         |
| <b>Effluent</b>    | Atenolol        | 4.91±0.07                          | 54.3±1.7                         | 98.7       | 3.1         | 102±3                            | 96.8       | 2.9         |
|                    | Propranolol     | 7.65±0.05                          | 55.4±1.9                         | 95.4       | 3.4         | 105±5                            | 97.1       | 4.9         |
|                    | Carbamazepine   | ND                                 | 48.4±2.1                         | 96.8       | 4.3         | 95.5±1.6                         | 95.5       | 1.7         |
| <b>Tap water</b>   | Atenolol        | ND                                 | 49.4±1.4                         | 98.8       | 2.8         | 99.2±2.0                         | 99.2       | 2.0         |
|                    | Propranolol     | ND                                 | 48.9±1.7                         | 97.7       | 3.5         | 98.9 ±3.0                        | 98.0       | 3.0         |
|                    | Carbamazepine   | ND                                 | 49.6±1.3                         | 99.1       | 2.6         | 99.5±4.1                         | 99.5       | 4.0         |
| <b>River water</b> | Atenolol        | 4.92±0.05                          | 53.3±1.6                         | 97.3       | 3.0         | 102±3                            | 97.4       | 2.9         |
|                    | Propranolol     | 2.05±0.03                          | 50.6±2.1                         | 97.0       | 4.2         | 99.1±1.9                         | 97.0       | 1.7         |
|                    | Carbamazepine   | ND                                 | 49.5±1.1                         | 98.9       | 2.2         | 99.1±2.3                         | 99.1       | 2.3         |

**Table S8.** Determination of DANO, ENRO and LEVO in real water samples (ng L<sup>-1</sup>, n = 3).

| <b>Samples</b>     | <b>Analytes</b> | <b>Initial (ng L<sup>-1</sup>)</b> | <b>Found (ng L<sup>-1</sup>)</b> | <b>%R</b> | <b>%RSD</b> | <b>Found (ng L<sup>-1</sup>)</b> | <b>%R</b> | <b>%RSD</b> |
|--------------------|-----------------|------------------------------------|----------------------------------|-----------|-------------|----------------------------------|-----------|-------------|
|                    |                 |                                    | 5                                |           |             | 20                               |           |             |
| <b>Influent</b>    | DANO            | 5.64±0.11                          | 10.3±0.4                         | 93.8      | 3.9         | 24.2±1.0                         | 92.8      | 4.1         |
|                    | ENRO            | 7.33±0.09                          | 12.1±0.5                         | 94.5      | 4.2         | 33.9±                            | 100       | 4.3         |
|                    | LEVO            | ND                                 | 4.87±0.20                        | 97.3      | 4.1         | 19.1±0.7                         | 95.3      | 3.7         |
| <b>Effluent</b>    | DANO            | 1.65±0.03                          | 6.52±0.21                        | 97.3      | 3.2         | 21.3±0.66                        | 98.1      | 3.1         |
|                    | ENRO            | 2.07±0.07                          | 6.88±0.17                        | 96.2      | 2.4         | 21.0±0.6                         | 94.4      | 2.9         |
|                    | LEVO            | ND                                 | 4.92±0.12                        | 98.3      | 2.5         | 19.3±0.4                         | 96.6      | 2.1         |
| <b>Tap water</b>   | DANO            | ND                                 | 4.97±0.09                        | 99.3      | 1.8         | 19.8±0.4                         | 98.9      | 1.9         |
|                    | ENRO            | ND                                 | 4.98±0.07                        | 99.6      | 1.5         | 19.8±0.4                         | 99.0      | 1.8         |
|                    | LEVO            | ND                                 | 4.91                             | 98.1      | 1.4         | 19.9±0.3                         | 99.5      | 1.7         |
| <b>River water</b> | DANO            | 2.40±0.03                          | 7.14±0.16                        | 94.8      | 2.3         | 21.5±0.3                         | 95.6      | 1.4         |
|                    | ENRO            | 3.12±0.05                          | 8.02±0.2                         | 97.9      | 2.5         | 22.4±0.3                         | 96.3      | 1.3         |
|                    | LEVO            | ND                                 | 4.94±0.09                        | 98.7      | 1.9         | 19.4±0.2                         | 97.1      | 1.0         |

**Table S9.** Determination of MP, EP, PP and BP in real water samples (ng L<sup>-1</sup>, n = 3).

| <b>Samples</b>     | <b>Analytes</b> | <b>Initial</b> | <b>Found</b> | <b>%</b> | <b>%RSD</b> | <b>Found</b> | <b>%R</b> | <b>%RSD</b> |
|--------------------|-----------------|----------------|--------------|----------|-------------|--------------|-----------|-------------|
|                    |                 |                | 50           |          |             | 100          |           |             |
| <b>Influent</b>    | MP              | 937±10         | 984±23       | 93.1     | 2.3         | 1078±32      | 94.3      | 3.0         |
|                    | EP              | 1.37±0.11      | 46.2±1.2     | 89.7     | 2.5         | 92.7±3.2     | 91.3      | 3.5         |
|                    | PP              | 781±11         | 828±25       | 94.3     | 3.1         | 924±24       | 96.1      | 2.6         |
|                    | BP              | ND             | 47.6±0.14    | 95.2     | 3.3         | 94.5±2.7     | 94.5      | 2.9         |
| <b>Effluent</b>    | MP              | 38.7±0.9       | 88.1±2.1     | 98.7     | 2.4         | 136±2.9      | 97.7      | 2.1         |
|                    | EP              | ND             | 48.7±1.0     | 97.3     | 2.1         | 96.5±1.8     | 96.5      | 1.9         |
|                    | PP              | 43.1±0.8       | 92.7±1.8     | 99.1     | 1.9         | 141±2.5      | 97.9      | 1.8         |
|                    | BP              | ND             | 48.9±1.7     | 97.8     | 3.4         | 95.7±2.0     | 95.7      | 2.1         |
| <b>Tap water</b>   | MP              | 3.89±0.09      | 53.5±1.2     | 99.3     | 2.2         | 103±1.3      | 98.7      | 1.3         |
|                    | EP              | ND             | 49.0±1.2     | 97.9     | 2.4         | 99.1±1.5     | 99.1      | 1.5         |
|                    | PP              | 4.81±0.05      | 53.8±1.3     | 98.0     | 2.4         | 104±1.7      | 99.3      | 1.6         |
|                    | BP              | ND             | 49.6±0.9     | 99.1     | 1.9         | 97.8±1.5     | 97.8      | 1.5         |
| <b>River water</b> | MP              | 40.1±1.1       | 88.8±1.5     | 97.3     | 1.7         | 137±2.3      | 96.6      | 1.7         |
|                    | EP              | ND             | 48.5±0.9     | 96.9     | 1.9         | 97.1±1.8     | 97.1      | 1.9         |
|                    | PP              | 10.7±0.8       | 59.7±1.4     | 98.3     | 2.4         | 108±1.4      | 97.0      | 1.3         |
|                    | BP              | ND             | 49.4±1.1     | 98.8     | 2.2         | 98.2±1.5     | 98.2      | 1.5         |



## List of supplementary figures

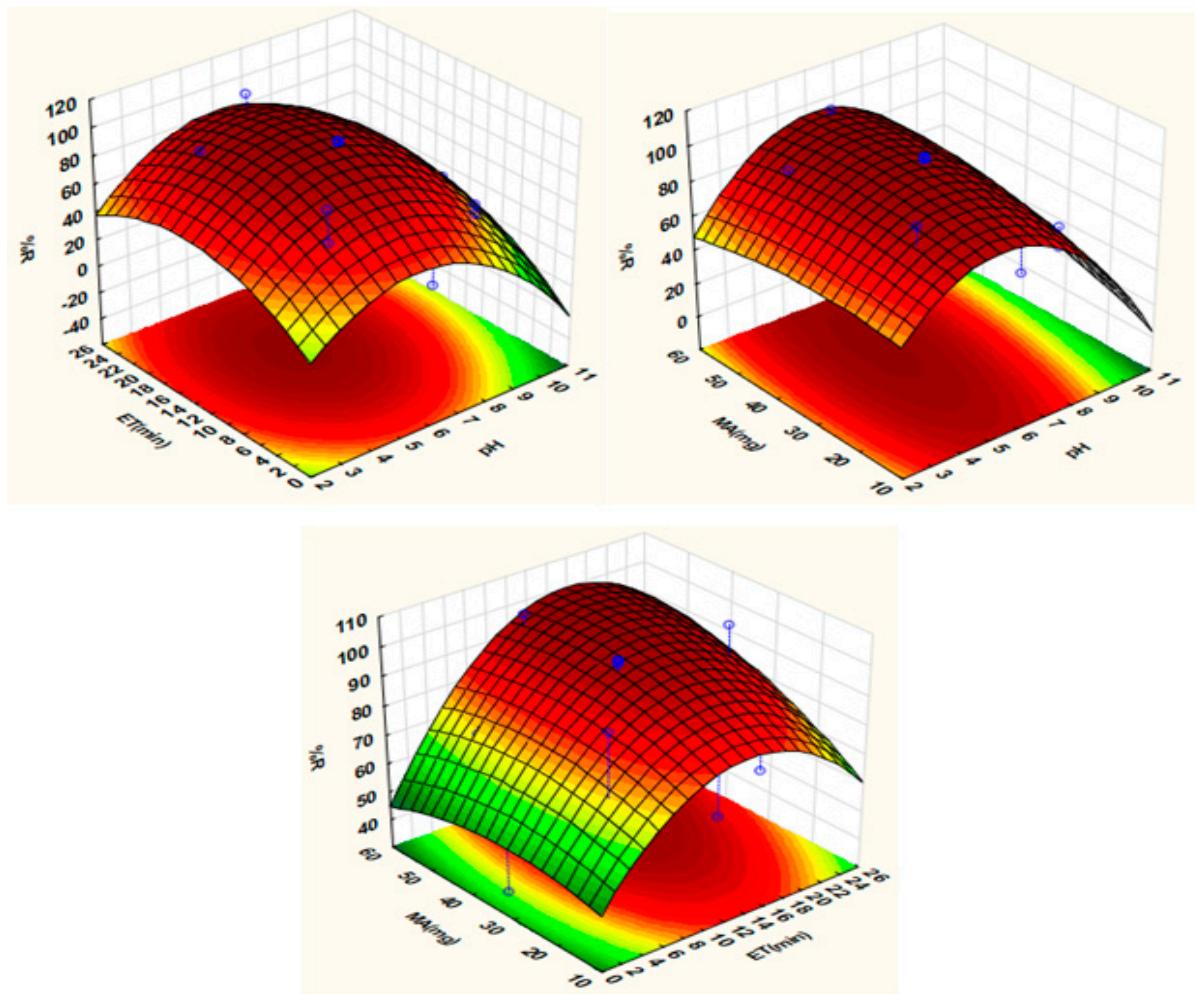

**Figure S1.** 3-D plots for the interaction of optimum parameters for pre-concentration of Beta-blockers and anticonvulsants.

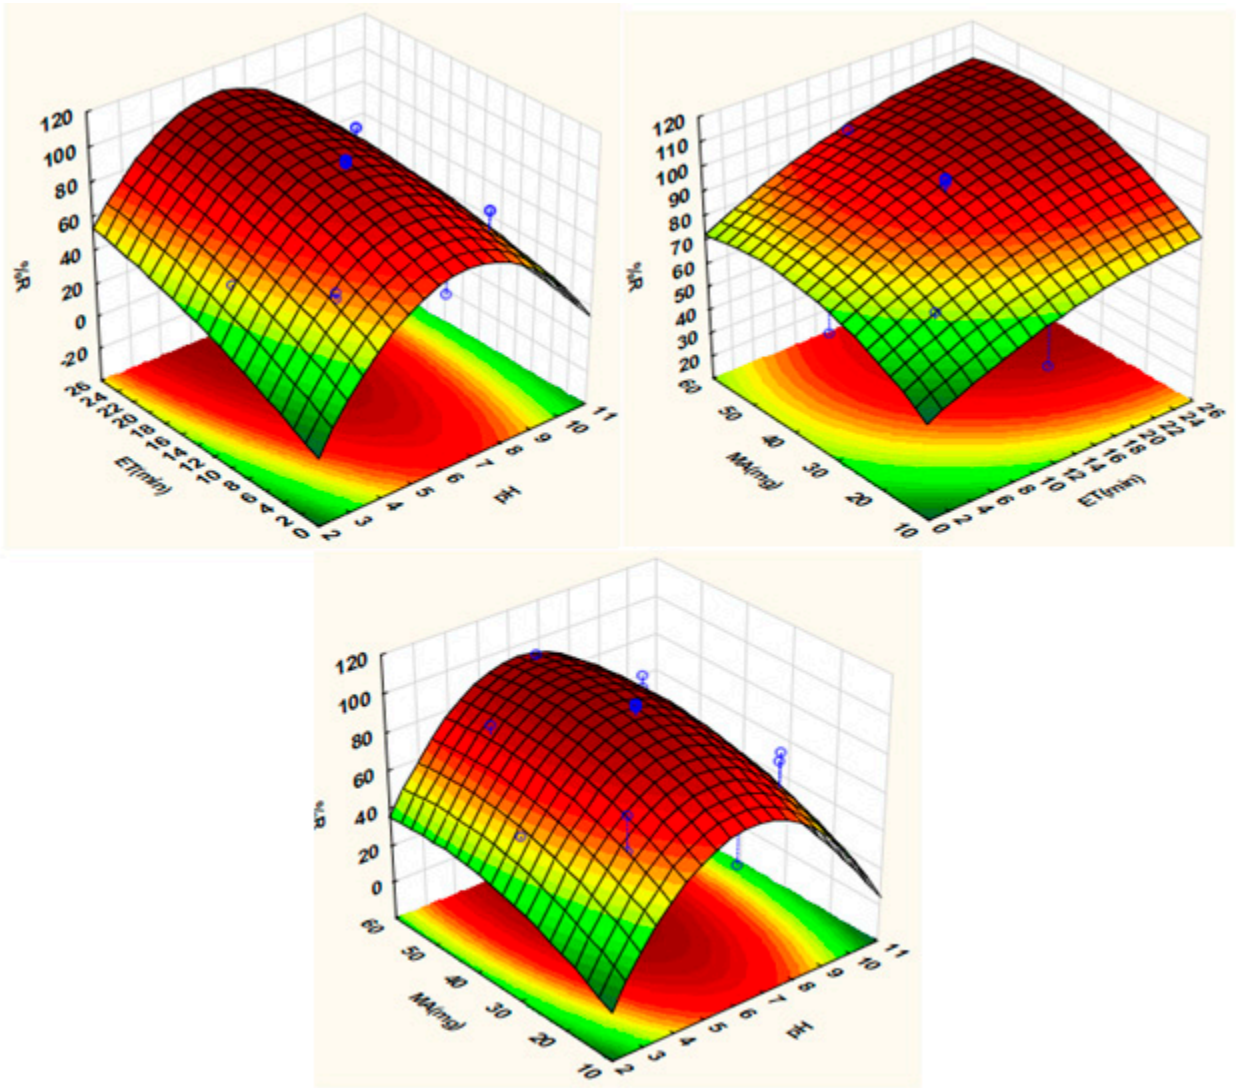

**Figure S2** 3-D plots for the interaction of optimum parameters for pre-concentration of three fluoroquinolones.

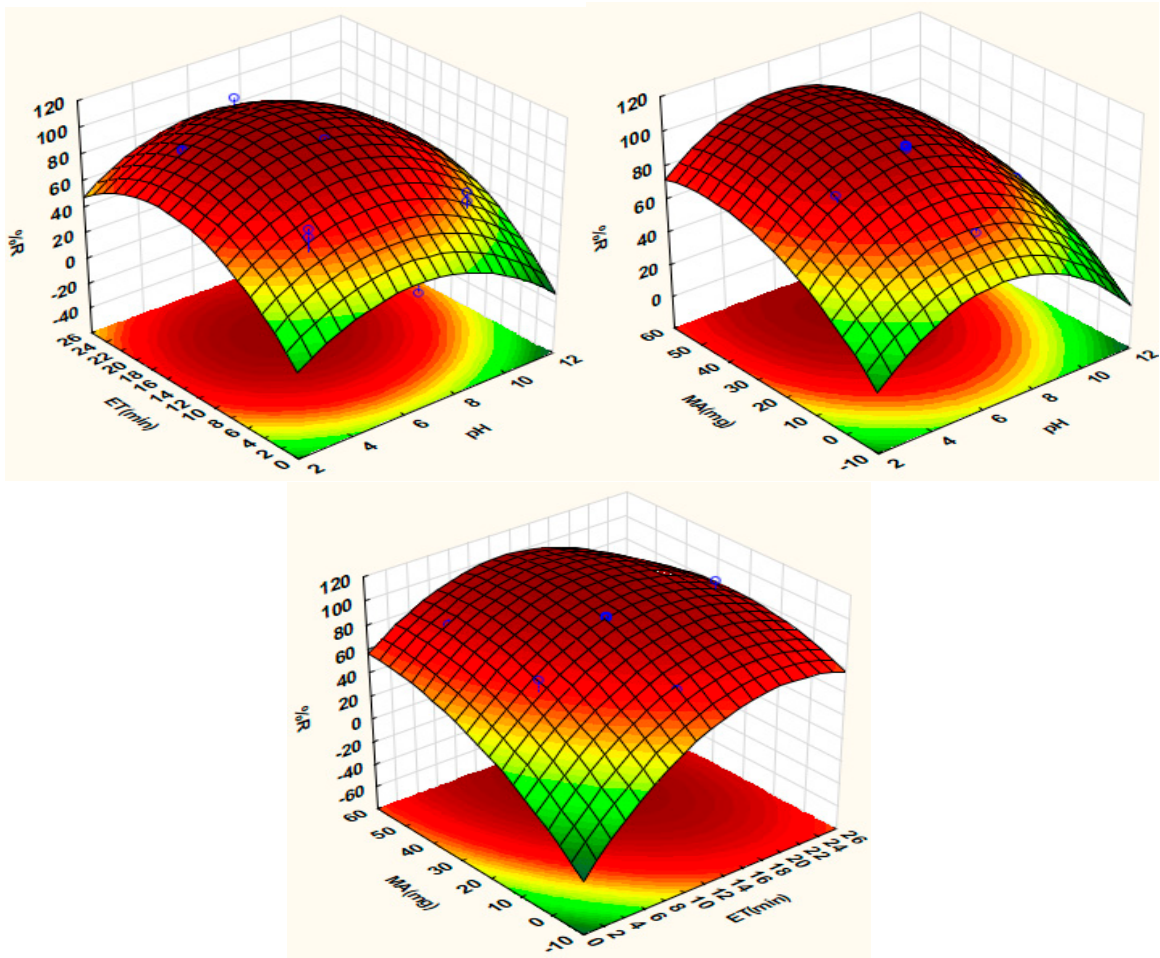

**Figure S3.** 3-D plots for the interaction of optimum parameters for pre-concentration of four parabens.

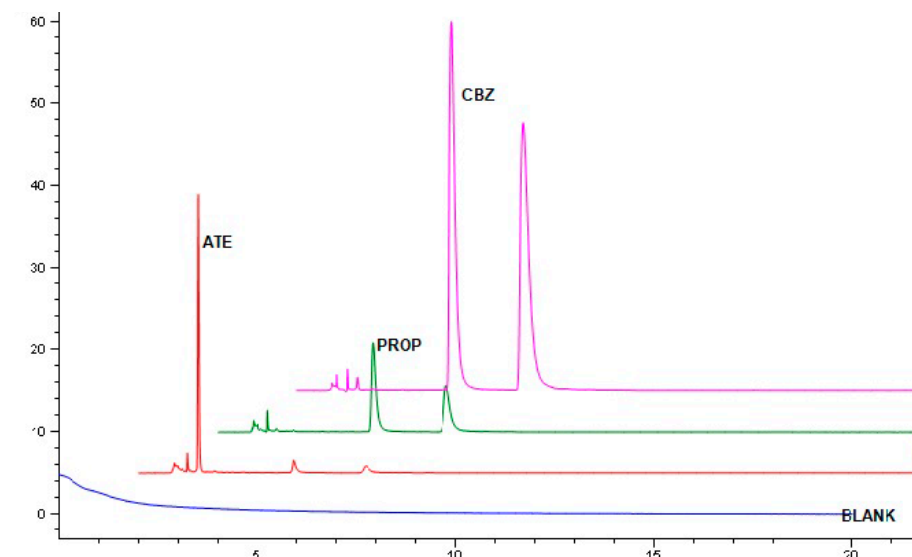

**Figure S4.** Typical chromatograms for preconcentration of Beta-blockers and anticonvulsants in influent samples.

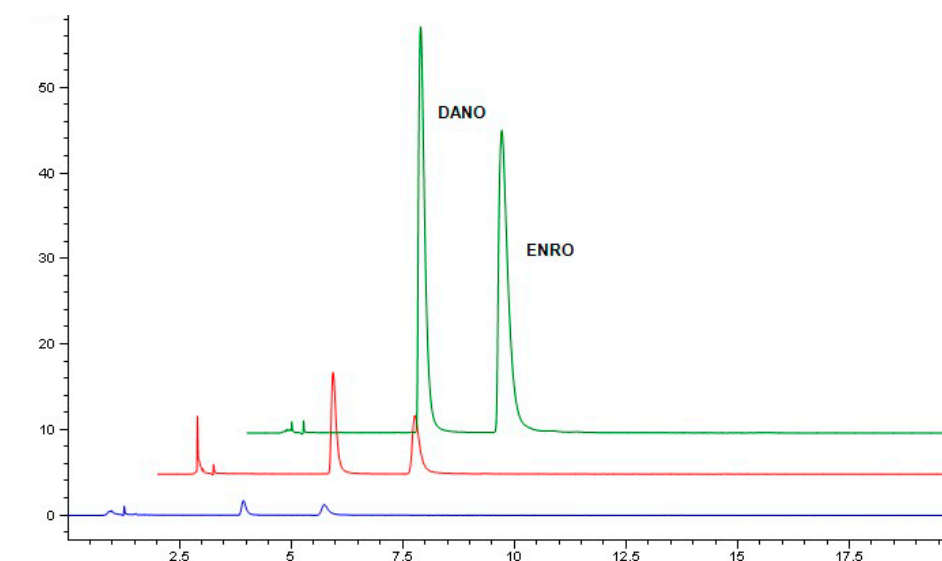

**Figure S5.** Typical chromatograms for preconcentration of fluoroquinolones in effluent samples.

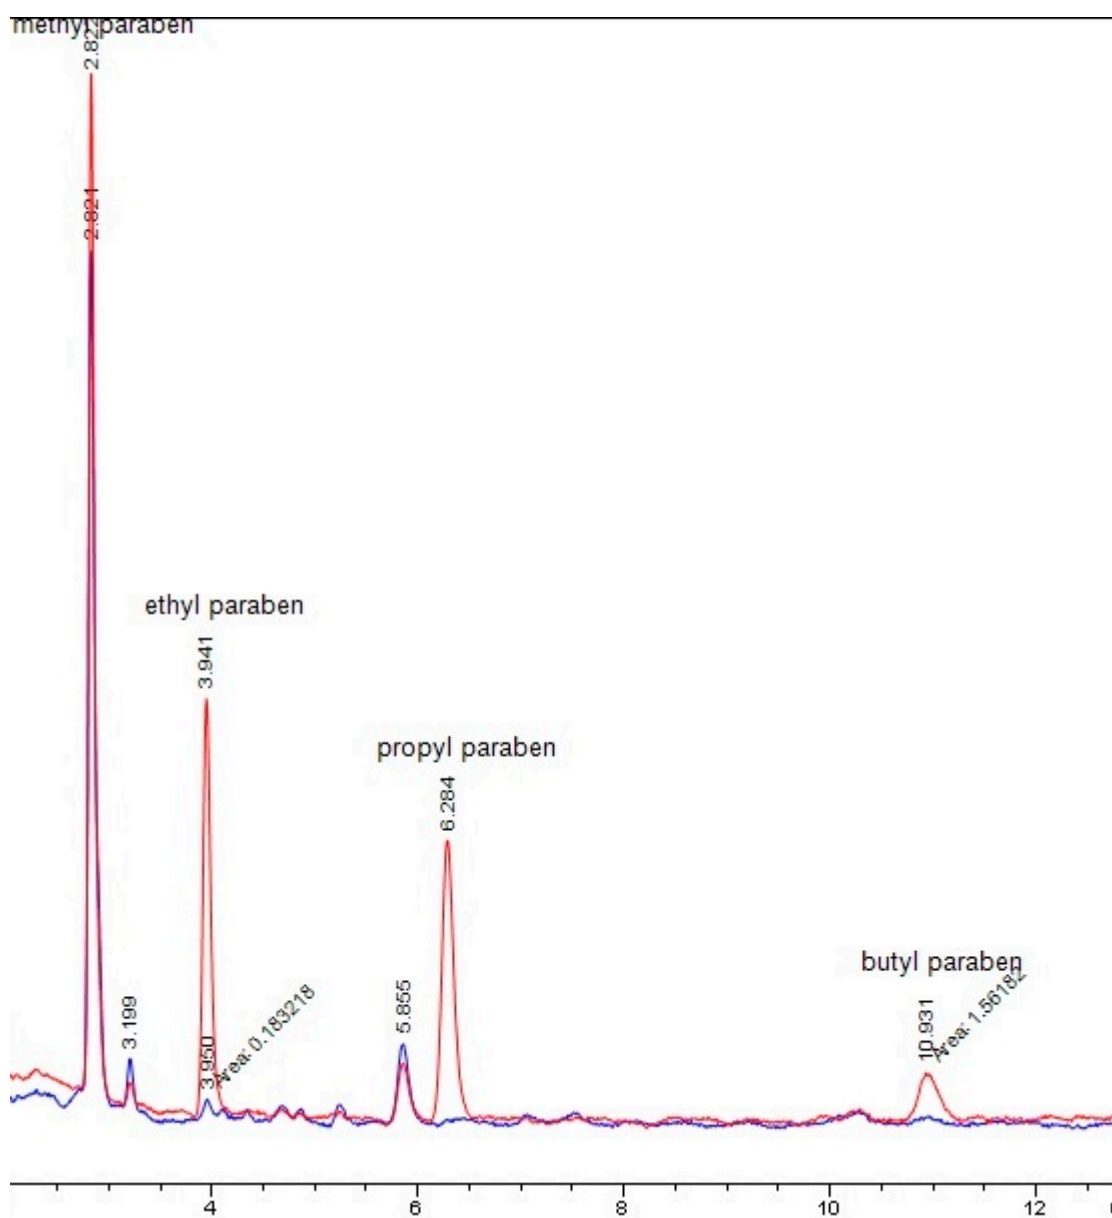

**Figure S6.** Typical chromatograms for preconcentration of parabens in influent samples.
